# Supplementary material for: A fully automated methodology for differentiating rock from snow, clouds and sea in Antarctica from Landsat imagery: A new rock outcrop map and area estimation for the entire Antarctic continent
Source: Copernicus journal article supplement (doi:10.5194/tc-2016-56), 2016-03-07
Supplement: Supplementary file 1 [file Landsat Tile IDs.pdf › Landsat Tile IDs.pdf]

| ID                    | WRS_Path | WRS_Row | Date       | Time              | Solar_Azimuth | Solar_Elev | Cloud_Cover |
|-----------------------|----------|---------|------------|-------------------|---------------|------------|-------------|
| LC82201072015017LGN00 | 220      | 107     | 17/01/2015 | 13:22:55.6930293Z | 59.025528     | 34.534508  | 8.23        |
| LC82071142014003LGN00 | 207      | 114     | 03/01/2014 | 12:06:44.4139013Z | 68.660309     | 28.708479  | 0.64        |
| LC82081122013343LGN00 | 208      | 112     | 09/12/2013 | 12:12:21.4818783Z | 60.743699     | 31.954828  | 2.02        |
| LC82081132013343LGN00 | 208      | 113     | 09/12/2013 | 12:12:45.4522249Z | 62.90956      | 30.706871  | 1.74        |
| LC82081142013343LGN00 | 208      | 114     | 09/12/2013 | 12:13:09.4105291Z | 65.558661     | 29.453997  | 1.78        |
| LC82121112013339LGN00 | 212      | 111     | 05/12/2013 | 12:36:41.9052656Z | 58.370529     | 32.894623  | 8.46        |
| LC82121122013339LGN00 | 212      | 112     | 05/12/2013 | 12:37:05.8684832Z | 60.148319     | 31.645316  | 3.63        |
| LC82121132014038LGN00 | 212      | 113     | 07/02/2014 | 12:36:50.3613359Z | 66.383645     | 22.008696  | 4.99        |
| LC82121142014038LGN00 | 212      | 114     | 07/02/2014 | 12:37:14.3106528Z | 69.135184     | 20.803871  | 6.28        |
| LC82131092013314LGN00 | 213      | 109     | 10/11/2013 | 12:42:11.6585510Z | 52.069791     | 30.950181  | 1.78        |
| LC82131102013314LGN00 | 213      | 110     | 10/11/2013 | 12:42:35.6311747Z | 53.360737     | 29.667689  | 4.24        |
| LC82131132013362LGN00 | 213      | 113     | 28/12/2013 | 12:43:28.8682812Z | 65.439774     | 30.533324  | 2.21        |
| LC82141042015087LGN00 | 214      | 104     | 28/03/2015 | 12:44:06.8877543Z | 46.826666     | 16.28648   | 0.7         |
| LC82141102014052LGN00 | 214      | 110     | 21/02/2014 | 12:47:48.9653022Z | 59.069804     | 21.070621  | 7.73        |
| LC82141112014052LGN00 | 214      | 111     | 21/02/2014 | 12:48:12.9244198Z | 60.707363     | 19.858264  | 0.56        |
| LC82151032013360LGN00 | 215      | 103     | 26/12/2013 | 12:51:51.5974887Z | 56.366867     | 42.470902  | 26.45       |
| LC82151042013344LGN00 | 215      | 104     | 10/12/2013 | 12:52:24.8738135Z | 53.958426     | 41.718716  | 33.48       |
| LC82151052013344LGN00 | 215      | 105     | 10/12/2013 | 12:52:48.8508478Z | 54.144864     | 40.536734  | 9.16        |
| LC82151072014011LGN00 | 215      | 107     | 11/01/2014 | 12:53:15.0327987Z | 58.582522     | 35.776266  | 0.05        |
| LC82151112014043LGN00 | 215      | 111     | 12/02/2014 | 12:54:28.3519665Z | 61.77401      | 22.836775  | 1.99        |
| LC82151142014011LGN00 | 215      | 114     | 11/01/2014 | 12:56:02.7609019Z | 69.261721     | 27.504561  | 6.17        |
| LC82161062014338LGN00 | 216      | 106     | 04/12/2014 | 12:57:58.2201100Z | 53.809576     | 38.812657  | 4.12        |
| LC82161072014306LGN00 | 216      | 107     | 02/11/2014 | 12:58:23.6625602Z | 49.589074     | 31.080399  | 18.46       |
| LC82161072014338LGN00 | 216      | 107     | 04/12/2014 | 12:58:22.1912650Z | 54.337318     | 37.601282  | 6.77        |
| LC82161082014338LGN00 | 216      | 108     | 04/12/2014 | 12:58:46.1699039Z | 55.050029     | 36.381063  | 0.39        |
| LC82161092014338LGN00 | 216      | 109     | 04/12/2014 | 12:59:10.1485429Z | 55.972986     | 35.153068  | 10.39       |
| LC82161122014050LGN00 | 216      | 112     | 19/02/2014 | 13:01:00.0006062Z | 62.915082     | 19.321718  | 2.73        |
| LC82171052013342LGN00 | 217      | 105     | 08/12/2013 | 13:05:11.3299376Z | 53.794966     | 40.444534  | 32.41       |
| LC82171102014329LGN00 | 217      | 110     | 25/11/2014 | 13:05:45.9242366Z | 55.759661     | 32.729974  | 7.14        |
| LC82171132013358LGN00 | 217      | 113     | 24/12/2013 | 13:08:13.5206922Z | 64.967345     | 30.799962  | 16.19       |
| LC82181052013333LGN00 | 218      | 105     | 29/11/2013 | 13:11:22.7696007Z | 52.173772     | 39.64639   | 25.78       |
| LC82181052015003LGN00 | 218      | 105     | 03/01/2015 | 13:09:47.8267071Z | 57.660186     | 39.240925  | 26.05       |
| LC82181082013349LGN00 | 218      | 108     | 15/12/2013 | 13:12:29.5878412Z | 56.460641     | 37.066868  | 25.92       |
| LC82191052013324LGN00 | 219      | 105     | 20/11/2013 | 13:17:33.6682628Z | 50.574743     | 38.24534   | 5.8         |
| LC82191052013340LGN00 | 219      | 105     | 06/12/2013 | 13:17:33.5021979Z | 53.439876     | 40.321739  | 6.99        |
| LC82191062013340LGN00 | 219      | 106     | 06/12/2013 | 13:17:57.4803361Z | 53.79375      | 39.119468  | 6.38        |
| LC82191092014327LGN00 | 219      | 109     | 23/11/2014 | 13:17:42.7712724Z | 54.249743     | 33.644206  | 4.53        |
| LC82191102014327LGN00 | 219      | 110     | 23/11/2014 | 13:18:06.7460006Z | 55.468351     | 32.387229  | 0.96        |
| LC82191112014039LGN00 | 219      | 111     | 08/02/2014 | 13:19:16.9254987Z | 62.145944     | 24.089037  | 3.81        |
| LC82191112014327LGN00 | 219      | 111     | 23/11/2014 | 13:18:30.7207288Z | 56.96749      | 31.124531  | 0.81        |
| LC82191122014039LGN00 | 219      | 112     | 08/02/2014 | 13:19:40.8820659Z | 64.030025     | 22.892167  | 1.86        |
| LC82201042015017LGN00 | 220      | 104     | 17/01/2015 | 13:21:43.7746572Z | 57.917366     | 37.928668  | 0.18        |
| LC82201052015017LGN00 | 220      | 105     | 17/01/2015 | 13:22:07.7498208Z | 58.13567      | 36.807815  | 4.13        |
| LC82201102013331LGN00 | 220      | 110     | 27/11/2013 | 13:25:43.8291846Z | 55.685308     | 33.190176  | 5.07        |
| LC82211082013338LGN00 | 221      | 108     | 04/12/2013 | 13:31:07.3625231Z | 54.686489     | 36.520711  | 4.26        |
| LC82211092014325LGN00 | 221      | 109     | 21/11/2014 | 13:30:03.2424507Z | 53.954435     | 33.277171  | 10.33       |
| LC82211122014021LGN00 | 221      | 112     | 21/01/2014 | 13:32:13.9695936Z | 64.739323     | 27.834911  | 0.96        |
| LC82211132014021LGN00 | 221      | 113     | 21/01/2014 | 13:32:37.9208328Z | 66.926432     | 26.642917  | 9.07        |
| LC82181032014016LGN00 | 218      | 103     | 16/01/2014 | 13:10:06.2729874Z | 57.511515     | 39.322652  | 6.1         |
| LC82171072014057LGN00 | 217      | 107     | 26/02/2014 | 13:05:04.2354182Z | 54.806568     | 22.988498  | 11.57       |
| LC82181062013301LGN00 | 218      | 106     | 28/10/2013 | 13:11:51.8606662Z | 47.882313     | 31.010589  | 26.78       |
| LC82181042014016LGN00 | 218      | 104     | 16/01/2014 | 13:10:30.2397525Z | 57.593178     | 38.208927  | 21.4        |
| LC82161162015037LGN00 | 216      | 116     | 06/02/2015 | 13:01:42.3929862Z | 76.908838     | 18.693174  | 0.96        |
| LC82161172014354LGN00 | 216      | 117     | 20/12/2014 | 13:02:19.1742571Z | 79.37581      | 25.912959  | 0.21        |
| LC82161172014018LGN00 | 216      | 117     | 18/01/2014 | 13:03:20.2262125Z | 81.607605     | 22.489576  | 0.15        |
| LC82071182013336LGN00 | 207      | 118     | 02/12/2013 | 12:08:35.8755038Z | 82.508178     | 23.690841  | 0.71        |
| LC82071182014003LGN00 | 207      | 118     | 03/01/2014 | 12:08:20.3852382Z | 86.434227     | 23.800261  | 0.96        |
| LC82091172014001LGN00 | 209      | 117     | 01/01/2014 | 12:20:19.4307937Z | 80.426454     | 25.256799  | 20.16       |
| LC82071192013352LGN00 | 207      | 119     | 18/12/2013 | 12:08:51.2896268Z | 91.557845     | 23.469187  | 3           |
| LC82071192013336LGN00 | 207      | 119     | 02/12/2013 | 12:08:59.8615116Z | 89.499506     | 22.403584  | 14.92       |
| LC81911212014339LGN00 | 191      | 121     | 05/12/2014 | 10:29:27.0126300Z | 107.471434    | 20.089992  | 0.09        |
| LC82001202014322LGN00 | 200      | 120     | 18/11/2014 | 11:24:41.6298242Z | 96.482263     | 18.499861  | 0.23        |
| LC81961222014310LGN00 | 196      | 122     | 06/11/2014 | 11:00:48.8458290Z | 114.602671    | 12.727117  | 0.06        |
| LC81661222013337LGN00 | 166      | 122     | 03/12/2013 | 07:56:48.4759586Z | 116.615335    | 18.633498  | 0.3         |
| LC81591222014003LGN00 | 159      | 122     | 03/01/2014 | 07:13:17.3936242Z | 120.298057    | 18.850325  | 5.17        |

|                       |     |     |                              |            |           |       |
|-----------------------|-----|-----|------------------------------|------------|-----------|-------|
| LC81591222015006LGN00 | 159 | 122 | 06/01/2015 07:11:58.1956049Z | 120.872723 | 18.472405 | 1.35  |
| LC81521222013319LGN00 | 152 | 122 | 15/11/2013 06:30:21.5577272Z | 114.827263 | 15.236349 | 0.07  |
| LC81521222013335LGN00 | 152 | 122 | 01/12/2013 06:30:16.9565424Z | 116.377118 | 18.359698 | 3.2   |
| LC81591202014339LGN00 | 159 | 120 | 05/12/2014 07:11:17.0649396Z | 98.319346  | 21.361824 | 1.23  |
| LC81591192015006LGN00 | 159 | 119 | 06/01/2015 07:10:46.2604616Z | 93.945715  | 22.189469 | 1.01  |
| LC81601192013343LGN00 | 160 | 119 | 09/12/2013 07:18:30.4256532Z | 90.3583    | 23.097594 | 0.45  |
| LC81681192013335LGN00 | 168 | 119 | 01/12/2013 08:07:58.1330435Z | 89.35062   | 22.250602 | 2.18  |
| LC81681192015005LGN00 | 168 | 119 | 05/01/2015 08:06:23.4148231Z | 93.864284  | 22.314694 | 2.84  |
| LC81681182013335LGN00 | 168 | 118 | 01/12/2013 08:07:34.1461481Z | 82.354468  | 23.539761 | 0.83  |
| LC81751172013336LGN00 | 175 | 117 | 02/12/2013 08:50:25.9095122Z | 76.629318  | 24.95822  | 0.62  |
| LC81721182014318LGN00 | 172 | 118 | 14/11/2014 08:30:53.2061024Z | 80.868611  | 20.131103 | 1.12  |
| LC81841162014034LGN00 | 184 | 116 | 03/02/2014 09:45:03.6285957Z | 76.73273   | 19.617715 | 3.2   |
| LC81831162013328LGN00 | 183 | 116 | 24/11/2013 09:39:26.7225311Z | 70.762768  | 25.022855 | 4.36  |
| LC81821162014340LGN00 | 182 | 116 | 06/12/2014 09:31:49.1665287Z | 72.682414  | 26.580636 | 0.62  |
| LC82331112013310LGN00 | 233 | 111 | 06/11/2013 14:46:36.3920466Z | 54.503873  | 27.314494 | 5.1   |
| LC82321122015005LGN00 | 232 | 112 | 05/01/2015 14:39:07.6273587Z | 64.403071  | 30.793097 | 1.4   |
| LC80031112014014LGN00 | 3   | 111 | 14/01/2014 15:04:33.8619502Z | 62.834991  | 30.517721 | 0.78  |
| LC80061112015006LGN00 | 6   | 111 | 06/01/2015 15:21:59.5710226Z | 62.73424   | 31.840041 | 13.12 |
| LC80051112014012LGN00 | 5   | 111 | 12/01/2014 15:16:58.2016191Z | 62.757073  | 30.897506 | 2.63  |
| LC82321132014338LGN00 | 232 | 113 | 04/12/2014 14:39:39.0070786Z | 62.557423  | 30.18389  | 0.87  |
| LC80031122014014LGN00 | 3   | 112 | 14/01/2014 15:04:57.8261573Z | 64.59751   | 29.32952  | 1.74  |
| LC80031132014334LGN00 | 3   | 113 | 30/11/2014 15:04:23.7060890Z | 61.985189  | 29.711617 | 4.55  |
| LC80051132014316LGN00 | 5   | 113 | 12/11/2014 15:16:47.5370752Z | 59.72257   | 26.184462 | 1.79  |
| LC80091132014040LGN00 | 9   | 113 | 09/02/2014 15:42:12.2613814Z | 66.213348  | 21.350384 | 2.29  |
| LC80081132014321LGN00 | 8   | 113 | 17/11/2014 15:35:17.8063924Z | 60.284935  | 27.381114 | 4.84  |
| LC80051142014316LGN00 | 5   | 114 | 12/11/2014 15:17:11.5099921Z | 62.485068  | 24.892305 | 0.36  |
| LC80071142014346LGN00 | 7   | 114 | 12/12/2014 15:29:23.9118130Z | 66.341818  | 29.531141 | 3.95  |
| LC80101142014335LGN00 | 10  | 114 | 01/12/2014 15:48:03.2199082Z | 64.807796  | 28.581944 | 25.56 |
| LC80051142014316LGN00 | 5   | 114 | 12/11/2014 15:17:11.5099921Z | 62.485068  | 24.892305 | 0.36  |
| LC80061152014275LGN00 | 6   | 115 | 02/10/2014 15:23:42.8569009Z | 64.092057  | 9.563771  | 0.23  |
| LC80081152014321LGN00 | 8   | 115 | 17/11/2014 15:36:05.7569298Z | 66.350026  | 24.805364 | 14.58 |
| LC80091152013309LGN00 | 9   | 115 | 05/11/2013 15:43:49.6239698Z | 64.806983  | 21.834458 | 3.56  |
| LC80101132014335LGN00 | 10  | 113 | 01/12/2014 15:47:39.2465868Z | 62.128608  | 29.845965 | 1.79  |
| LC80101152014351LGN00 | 10  | 115 | 17/12/2014 15:48:22.9510012Z | 70.258167  | 28.412749 | 2.41  |
| LC80141152014315LGN00 | 14  | 115 | 11/11/2014 16:13:13.0596060Z | 65.738488  | 23.348231 | 4.52  |
| LC80111152013323LGN00 | 11  | 115 | 19/11/2013 15:56:04.7608133Z | 66.169518  | 25.387908 | 2.08  |
| LC80171142015019LGN00 | 17  | 114 | 19/01/2015 16:31:06.7393660Z | 69.891687  | 25.85342  | 20.5  |
| LC80191122014350LGN00 | 19  | 112 | 16/12/2014 16:42:48.1286727Z | 62.122533  | 32.11191  | 1.05  |
| LC80191132014350LGN00 | 19  | 113 | 16/12/2014 16:43:12.0973850Z | 64.269938  | 30.881517 | 0.31  |
| LC80221132014323LGN00 | 22  | 113 | 19/11/2014 17:01:47.7162669Z | 60.530671  | 27.827943 | 9.51  |
| LC80241132015020LGN00 | 24  | 113 | 20/01/2015 17:13:57.8798458Z | 67.241088  | 26.816026 | 0.56  |
| LC80221142014323LGN00 | 22  | 114 | 19/11/2014 17:02:11.6895881Z | 63.26077   | 26.544809 | 15.6  |
| LC80251142014312LGN00 | 25  | 114 | 08/11/2014 17:20:48.1703014Z | 62.112755  | 23.850581 | 0.72  |
| LC80221152014323LGN00 | 22  | 115 | 19/11/2014 17:02:35.6579857Z | 66.57584   | 25.258167 | 1.1   |
| LC80241152014305LGN00 | 24  | 115 | 01/11/2014 17:14:58.5163597Z | 64.955337  | 20.47818  | 2.17  |
| LC80301142014347LGN00 | 30  | 114 | 13/12/2014 17:51:33.6054003Z | 66.494873  | 29.574852 | 8.21  |
| LC80241152013318LGN00 | 24  | 115 | 14/11/2013 17:16:29.5502493Z | 65.632871  | 24.264933 | 4.26  |
| LC80251152015011LGN00 | 25  | 115 | 11/01/2015 17:21:00.8491318Z | 72.806114  | 26.23835  | 2.71  |
| LC80261152014351LGN00 | 26  | 115 | 17/12/2014 17:27:16.1383825Z | 70.265187  | 28.413614 | 4.32  |
| LC80251162014312LGN00 | 25  | 116 | 08/11/2014 17:21:36.0196381Z | 69.535706  | 21.253246 | 0.91  |
| LC80311152014354LGN00 | 31  | 115 | 20/12/2014 17:58:10.5665281Z | 70.665805  | 28.395762 | 4.8   |
| LC80311162013335LGN00 | 31  | 116 | 01/12/2013 18:00:04.4551935Z | 71.695715  | 26.161731 | 4.17  |
| LC80221222013336LGN00 | 22  | 122 | 02/12/2013 17:06:50.9898580Z | 116.55575  | 18.553864 | 0.59  |
| LC80311222014338LGN00 | 31  | 122 | 04/12/2014 18:01:00.9644251Z | 117.12274  | 18.72338  | 1.81  |
| LC80471192014338LGN00 | 47  | 119 | 04/12/2014 19:38:42.0468759Z | 90.128551  | 22.59091  | 3.84  |
| LC80541182014019LGN00 | 54  | 118 | 19/01/2014 20:22:32.1938215Z | 87.500794  | 20.983186 | 1.78  |
| LC80541172013336LGN00 | 54  | 117 | 02/12/2013 20:22:37.2709399Z | 76.693185  | 25.017432 | 2.72  |
| LC80541162014003LGN00 | 54  | 116 | 03/01/2014 20:21:57.5286178Z | 75.846897  | 26.222243 | 9.21  |
| LC80561162014001LGN00 | 56  | 116 | 01/01/2014 20:34:20.6090557Z | 75.66083   | 26.452032 | 10.59 |
| LC80601152013330LGN00 | 60  | 115 | 26/11/2013 20:58:53.2240345Z | 67.071908  | 26.733666 | 7.54  |
| LC80581152013348LGN00 | 58  | 115 | 14/12/2013 20:46:27.7208537Z | 69.543966  | 28.448177 | 10.06 |
| LC80591152015025LGN00 | 59  | 115 | 25/01/2015 20:51:02.8151763Z | 73.216502  | 23.176149 | 6.91  |
| LC80591142014022LGN00 | 59  | 114 | 22/01/2014 20:51:49.7023191Z | 69.610088  | 25.134693 | 3.09  |
| LC80541152014003LGN00 | 54  | 115 | 03/01/2014 20:21:33.4513457Z | 71.89758   | 27.450755 | 1.7   |
| LC80601122013362LGN00 | 60  | 112 | 28/12/2013 20:57:30.1238847Z | 63.343269  | 31.717821 | 1.79  |
| LC80631142015021LGN00 | 63  | 114 | 21/01/2015 21:15:22.8701710Z | 69.943076  | 25.347388 | 1.29  |

|                       |     |     |                              |           |           |       |
|-----------------------|-----|-----|------------------------------|-----------|-----------|-------|
| LC80631132014002LGN00 | 63  | 113 | 02/01/2014 21:16:23.5961602Z | 65.983677 | 29.994445 | 2.96  |
| LC80631122014002LGN00 | 63  | 112 | 02/01/2014 21:15:59.6360297Z | 63.846175 | 31.2001   | 2.02  |
| LC80631112014002LGN00 | 63  | 111 | 02/01/2014 21:15:35.6758993Z | 62.110204 | 32.39886  | 3.22  |
| LC80631102014002LGN00 | 63  | 110 | 02/01/2014 21:15:11.7077821Z | 60.709824 | 33.590595 | 0.67  |
| LC80651132014304LGN00 | 65  | 113 | 31/10/2014 21:27:33.4850649Z | 58.699274 | 22.825613 | 1.12  |
| LC80651122015019LGN00 | 65  | 112 | 19/01/2015 21:26:57.9422055Z | 65.066643 | 28.186362 | 20.12 |
| LC80651112013365LGN00 | 65  | 111 | 31/12/2013 21:27:58.6173707Z | 61.925476 | 32.628207 | 1.42  |
| LC80651102015019LGN00 | 65  | 110 | 19/01/2015 21:26:09.9975436Z | 61.833212 | 30.544564 | 9.42  |
| LC80691112013329LGN00 | 69  | 111 | 25/11/2013 21:52:54.3717380Z | 56.925162 | 31.672478 | 3.53  |
| LC80671112013331LGN00 | 67  | 111 | 27/11/2013 21:40:33.2987438Z | 57.2194   | 31.981065 | 2.83  |
| LC80671102013363LGN00 | 67  | 110 | 29/12/2013 21:39:57.3688183Z | 60.326308 | 34.027185 | 1.69  |
| LC80701112014307LGN00 | 70  | 111 | 03/11/2014 21:57:41.4204805Z | 54.673023 | 26.34845  | 26.53 |
| LC80701102014003LGN00 | 70  | 110 | 03/01/2014 21:58:26.5936373Z | 60.798344 | 33.459882 | 0.24  |
| LC80701092014003LGN00 | 70  | 109 | 03/01/2014 21:58:02.6282946Z | 59.680709 | 34.642084 | 0.12  |
| LC80721092013318LGN00 | 72  | 109 | 14/11/2013 22:10:44.7788108Z | 52.638768 | 32.030625 | 2.55  |
| LC80741092015034LGN00 | 74  | 109 | 03/02/2015 22:21:20.2897621Z | 60.048734 | 27.825105 | 0.53  |
| LC80741092015018LGN00 | 74  | 109 | 18/01/2015 22:21:23.9239708Z | 60.665639 | 31.925326 | 6.41  |
| LC80761082013314LGN00 | 76  | 108 | 10/11/2013 22:35:05.8900436Z | 51.070182 | 32.332876 | 4.11  |
| LC80791082014034LGN00 | 79  | 108 | 03/02/2014 22:52:55.6161674Z | 58.706144 | 29.011973 | 2.76  |
| LC80811082014016LGN00 | 81  | 108 | 16/01/2014 23:05:24.4695240Z | 59.402414 | 33.557902 | 3.02  |
| LC80801082014329LGN00 | 80  | 108 | 25/11/2014 22:58:16.4404728Z | 53.651994 | 35.295359 | 1.01  |
| LC80831072015017LGN00 | 83  | 107 | 17/01/2015 23:16:13.8247821Z | 59.029702 | 34.445291 | 0.14  |
| LC80861072014019LGN00 | 86  | 107 | 19/01/2014 23:35:54.3767018Z | 58.683777 | 34.054479 | 2.72  |
| LC80841072014325LGN00 | 84  | 107 | 21/11/2014 23:22:33.9138209Z | 52.249772 | 35.855961 | 12.78 |
| LC80881072014049LGN00 | 88  | 107 | 18/02/2014 23:47:56.1854278Z | 56.035266 | 25.521142 | 12.01 |
| LC80901062015034LGN00 | 90  | 106 | 03/02/2015 23:59:01.2826170Z | 57.584981 | 31.293177 | 0.55  |
| LC80951072013304LGN00 | 95  | 107 | 31/10/2013 00:32:06.7254258Z | 48.899089 | 30.507088 | 0.31  |
| LC80991072013332LGN00 | 99  | 107 | 28/11/2013 00:56:43.3348741Z | 52.864526 | 36.997546 | 0.33  |
| LC81051062013326LGN00 | 105 | 106 | 22/11/2013 01:33:22.8674288Z | 51.27374  | 37.284458 | 13.03 |
| LC81041072013303LGN00 | 104 | 107 | 30/10/2013 01:27:43.6094823Z | 48.796289 | 30.206593 | 2.83  |
| LC81061072013301LGN00 | 106 | 107 | 28/10/2013 01:40:04.8755960Z | 48.595996 | 29.569304 | 10.39 |
| LC81071072014327LGN00 | 107 | 107 | 23/11/2014 01:44:43.1937624Z | 52.420816 | 36.055558 | 6.69  |
| LC81111062013320LGN00 | 111 | 106 | 16/11/2013 02:10:33.7162470Z | 50.310158 | 36.08903  | 0.22  |
| LC81111072013320LGN00 | 111 | 107 | 16/11/2013 02:10:57.6964724Z | 50.948838 | 34.83193  | 0.46  |
| LC81111082015054LGN00 | 111 | 108 | 23/02/2015 02:09:28.5753651Z | 56.641668 | 22.956131 | 0.21  |
| LC81131072013318LGN00 | 113 | 107 | 14/11/2013 02:23:20.5610861Z | 50.656887 | 34.377781 | 3.04  |
| LC81161072013355LGN00 | 116 | 107 | 21/12/2013 02:41:37.9835793Z | 56.60127  | 38.180163 | 0.02  |
| LC81201072013303LGN00 | 120 | 107 | 30/10/2013 03:06:36.7267405Z | 48.798745 | 30.229459 | 0.62  |
| LC81241082014334LGN00 | 124 | 108 | 30/11/2014 03:30:12.5965257Z | 54.321305 | 35.895972 | 5.96  |
| LC81241092015017LGN00 | 124 | 109 | 17/01/2015 03:30:25.6014941Z | 60.640272 | 32.311386 | 0.36  |
| LC81221112013317LGN00 | 122 | 111 | 13/11/2013 03:20:34.3084967Z | 55.223019 | 29.045528 | 0.04  |
| LC81241112014014LGN00 | 124 | 111 | 14/01/2014 03:32:23.2364761Z | 62.819738 | 30.610883 | 0.02  |
| LC81211122014361LGN00 | 121 | 112 | 27/12/2014 03:13:09.1098398Z | 63.475344 | 31.784227 | 0.03  |
| LC81211122013310LGN00 | 121 | 112 | 06/11/2013 03:14:49.0532843Z | 56.374594 | 25.881366 | 0.3   |
| LC81271092013304LGN00 | 127 | 109 | 31/10/2013 03:50:40.8586428Z | 50.940419 | 27.973514 | 5.17  |
| LC81271092014339LGN00 | 127 | 109 | 05/12/2014 03:49:07.2157199Z | 56.062772 | 35.213873 | 3.48  |
| LC81271102014339LGN00 | 127 | 110 | 05/12/2014 03:49:31.1916538Z | 57.224694 | 33.980181 | 0.32  |
| LC81271112014339LGN00 | 127 | 111 | 05/12/2014 03:49:55.1675878Z | 58.669954 | 32.739752 | 0.91  |
| LC81271122014323LGN00 | 127 | 112 | 19/11/2014 03:50:19.7433223Z | 58.217919 | 28.989981 | 14.1  |
| LC81271132014339LGN00 | 127 | 113 | 05/12/2014 03:50:43.1130688Z | 62.632376 | 30.240768 | 1.51  |
| LC81271142014339LGN00 | 127 | 114 | 05/12/2014 03:51:07.0890027Z | 65.299226 | 28.982911 | 0.44  |
| LC81291082014305LGN00 | 129 | 108 | 01/11/2014 04:01:05.8253833Z | 50.341945 | 29.383749 | 3.21  |
| LC81201092013335LGN00 | 120 | 109 | 01/12/2013 03:07:18.9774268Z | 55.053523 | 34.920892 | 0.97  |
| LC81301082014344LGN00 | 130 | 108 | 10/12/2014 04:07:11.6796191Z | 55.95261  | 36.794438 | 5.06  |
| LC81281102013311LGN00 | 128 | 110 | 07/11/2013 03:57:16.8376187Z | 52.971405 | 28.761469 | 2.13  |
| LC81291112013318LGN00 | 129 | 111 | 14/11/2013 04:03:49.5233504Z | 55.343821 | 29.297163 | 1     |
| LC81291122014337LGN00 | 129 | 112 | 03/12/2014 04:02:41.7989410Z | 60.157398 | 31.283202 | 2.47  |
| LC81311082014335LGN00 | 131 | 108 | 01/12/2014 04:13:28.1693453Z | 54.487982 | 36.023716 | 3.48  |
| LC81311092014303LGN00 | 131 | 109 | 30/10/2014 04:13:49.9288786Z | 51.267826 | 27.472346 | 0.74  |
| LC81311102014335LGN00 | 131 | 110 | 01/12/2014 04:14:16.1226644Z | 56.605234 | 33.546732 | 12    |
| LC81311122014335LGN00 | 131 | 112 | 01/12/2014 04:15:04.0676000Z | 59.863264 | 31.044356 | 21.47 |
| LC81341082014308LGN00 | 134 | 108 | 04/11/2014 04:32:01.7229317Z | 50.658986 | 30.293873 | 0.07  |
| LC81331082014333LGN00 | 133 | 108 | 29/11/2014 04:25:50.0588294Z | 54.160631 | 35.770943 | 1.06  |
| LC81351082013360LGN00 | 135 | 108 | 26/12/2013 04:39:26.3737842Z | 57.91367  | 36.720102 | 0.11  |
| LC81361072015021LGN00 | 136 | 107 | 21/01/2015 04:43:44.9864641Z | 58.986386 | 33.731168 | 2.07  |
| LC81361082015037LGN00 | 136 | 108 | 06/02/2015 04:44:05.6519150Z | 58.815825 | 28.338833 | 0.31  |

|                       |     |     |                              |             |            |       |
|-----------------------|-----|-----|------------------------------|-------------|------------|-------|
| LC81381072015051LGN00 | 138 | 107 | 20/02/2015 04:55:57.0976985Z | 56.155463   | 25.115289  | 1.67  |
| LC81381082014304LGN00 | 138 | 108 | 31/10/2014 04:56:42.5128078Z | 50.24439    | 29.085383  | 0.04  |
| LC81401072013315LGN00 | 140 | 107 | 11/11/2013 05:10:14.0000947Z | 50.246135   | 33.677336  | 0.66  |
| LC81401082014014LGN00 | 140 | 108 | 14/01/2014 05:10:04.3891860Z | 59.344927   | 34.118375  | 0.73  |
| LC81421062014300LGN00 | 142 | 106 | 27/10/2014 05:20:39.1794895Z | 48.165489   | 30.37359   | 0.75  |
| LC81421072015047LGN00 | 142 | 107 | 16/02/2015 05:20:40.1366441Z | 56.753761   | 26.412246  | 7.27  |
| LC81431072014019LGN00 | 143 | 107 | 19/01/2014 05:28:10.9977316Z | 58.68079    | 34.226851  | 7.72  |
| LC81431082013352LGN00 | 143 | 108 | 18/12/2013 05:28:55.7134681Z | 56.850801   | 37.0622    | 0.34  |
| LC81451072015036LGN00 | 145 | 107 | 05/02/2015 05:39:19.6122239Z | 58.088775   | 29.785393  | 3.57  |
| LC81451082015020LGN00 | 145 | 108 | 20/01/2015 05:39:47.0139051Z | 59.724496   | 32.798503  | 3.02  |
| LC81471082014351LGN00 | 147 | 108 | 17/12/2014 05:52:16.8529496Z | 57.051156   | 36.961547  | 0.17  |
| LC81471092014351LGN00 | 147 | 109 | 17/12/2014 05:52:40.8225180Z | 57.929436   | 35.761724  | 0.1   |
| LC81471102015034LGN00 | 147 | 110 | 03/02/2015 05:52:54.0778190Z | 61.334871   | 26.850504  | 0.03  |
| LC81471112014351LGN00 | 147 | 111 | 17/12/2014 05:53:28.7830119Z | 60.459766   | 33.337182  | 0.01  |
| LC81491082014317LGN00 | 149 | 108 | 13/11/2014 06:04:45.0814244Z | 51.756319   | 32.735777  | 0.71  |
| LC81491092014333LGN00 | 149 | 109 | 29/11/2014 06:05:07.1691091Z | 55.119621   | 34.541093  | 1.23  |
| LC81501102013321LGN00 | 150 | 110 | 17/11/2013 06:13:10.7033622Z | 54.195216   | 31.288351  | 3.36  |
| LC81491112015016LGN00 | 149 | 111 | 16/01/2015 06:05:44.5384391Z | 63.208838   | 30.152453  | 0.22  |
| LC81521112014338LGN00 | 152 | 111 | 04/12/2014 06:24:26.1944607Z | 58.53407    | 32.651308  | 0.3   |
| LC81541112014352LGN00 | 154 | 111 | 18/12/2014 06:36:44.7898328Z | 60.606459   | 33.335282  | 2.68  |
| LC81561102014302LGN00 | 156 | 110 | 29/10/2014 06:48:44.8615982Z | 52.551543   | 25.892639  | 2.61  |
| LC81561112014318LGN00 | 156 | 111 | 14/11/2014 06:49:12.4373124Z | 55.748556   | 29.163188  | 6.88  |
| LC81561112014030LGN00 | 156 | 111 | 30/01/2014 06:50:03.8165341Z | 62.748668   | 26.797659  | 12.8  |
| LC81591112014339LGN00 | 159 | 111 | 05/12/2014 07:07:41.3524736Z | 58.692308   | 32.752424  | 1.07  |
| LC81611112013350LGN00 | 161 | 111 | 16/12/2013 07:21:24.4824566Z | 59.985      | 33.429762  | 20.97 |
| LC81651102014045LGN00 | 165 | 110 | 14/02/2014 07:45:03.2642536Z | 59.986734   | 23.46326   | 0.98  |
| LC81631112014047LGN00 | 163 | 111 | 16/02/2014 07:33:04.7930004Z | 61.35181    | 21.612284  | 1.06  |
| LC81651102014317LGN00 | 165 | 110 | 13/11/2014 07:44:26.1343811Z | 54.083613   | 30.207273  | 2.41  |
| LC81651112014317LGN00 | 165 | 111 | 13/11/2014 07:44:50.1131735Z | 55.636863   | 28.92788   | 10.69 |
| LC81661112014292LGN00 | 166 | 111 | 19/10/2014 07:51:01.5543318Z | 53.572899   | 21.170595  | 3.28  |
| LC81661112014324LGN00 | 166 | 111 | 20/11/2014 07:50:56.7390169Z | 56.52273    | 30.505612  | 13.01 |
| LC81781132013341LGN00 | 178 | 113 | 07/12/2013 09:07:21.8496286Z | 62.593422   | 30.553769  | 0.28  |
| LC81791122014351LGN00 | 179 | 112 | 17/12/2014 09:11:38.9585746Z | 62.232465   | 32.112672  | 0.08  |
| LC81751142014323LGN00 | 175 | 114 | 19/11/2014 08:47:46.8482015Z | 63.235099   | 26.468773  | 7.47  |
| LC81751132014035LGN00 | 175 | 113 | 04/02/2014 08:48:13.4388680Z | 66.577439   | 22.962529  | 0.92  |
| LC81751132014323LGN00 | 175 | 113 | 19/11/2014 08:47:22.8702880Z | 60.502245   | 27.752376  | 2.54  |
| LC81751122014323LGN00 | 175 | 112 | 19/11/2014 08:46:58.8923746Z | 58.250727   | 29.031983  | 7.69  |
| LC81751112014323LGN00 | 175 | 111 | 19/11/2014 08:46:34.9144611Z | 56.397793   | 30.306787  | 13.87 |
| LC81751102014323LGN00 | 175 | 110 | 19/11/2014 08:46:10.9312579Z | 54.876192   | 31.577111  | 6.82  |
| LC81721122015017LGN00 | 172 | 112 | 17/01/2015 08:28:16.7392064Z | 65.015001   | 28.739573  | 4.1   |
| LC81741112014316LGN00 | 174 | 111 | 12/11/2014 08:40:27.6645361Z | 55.527633   | 28.687112  | 28.84 |
| LC81701122014352LGN00 | 170 | 112 | 18/12/2014 08:16:01.8550946Z | 62.36386    | 32.112786  | 0.83  |
| LC81701112013301LGN00 | 170 | 111 | 28/10/2013 08:17:12.9219307Z | 53.694499   | 24.474245  | 30.81 |
| LC81701112014352LGN00 | 170 | 111 | 18/12/2014 08:15:37.8821778Z | 60.621518   | 33.333418  | 2.08  |
| LC81681112014002LGN00 | 168 | 111 | 02/01/2014 08:04:31.7187239Z | 62.053355   | 32.46689   | 9.03  |
| LC82101022014264LGN00 | 210 | 102 | 21/09/2014 12:19:13.5139636Z | 43.45277539 | 22.1404639 | 4.44  |
| LC82091022014273LGN00 | 209 | 102 | 30/09/2014 12:13:05.5262014Z | 43.98122536 | 25.6939458 | 51.4  |
| LC80011082014272LGN00 | 1   | 108 | 29/09/2014 14:49:59.0527596Z | 48.38610743 | 17.5537405 | 0.14  |
| LC80601072014301LGN00 | 60  | 107 | 28/10/2014 20:54:15.0483645Z | 49.10071222 | 29.6251389 | 1.35  |
| LC80701072014307LGN00 | 70  | 107 | 03/11/2014 21:56:05.5047089Z | 49.74664892 | 31.4877123 | 6.12  |
| LC80731062014040LGN00 | 73  | 106 | 09/02/2014 22:14:56.4816166Z | 56.59286761 | 29.5701962 | 5.57  |
| LC80271222014326LGN00 | 27  | 122 | 22/11/2014 17:36:01.6824580Z | 115.8211063 | 16.8011546 | 1.13  |
